# Supplementary material for: Eosinopenia Predicts Prognosis in Severe Community-Acquired Pneumonia
Source: Research Square preprint supplement (doi:10.21203/rs.3.rs-7899511/v1), 2025-11-14

**Supplemental Online Material**

**Eosinopenia Predicts Prognosis in Severe Community-Acquired Pneumonia**

Catia Cillóniz1,2,5*, Tatiana Castañeda4*, Antonio Campanella3, Riccardo Guglielmi3, Albert Gabarrús1, Sara Granero7, Cristina Calvo-García7 Maria Angeles Marcos6, Antoni Torres1,2,4

1 August Pi i Sunyer Biomedical Research Institute–IDIBAPS, Barcelona, Spain.

2 Ciber de Enfermedades Respiratorias (CIBERES), Barcelona, Spain

3 Department of Medical –Surgical Sciences and Translational Medicine, Sapienza University of Rome, Italy

4 University of Barcelona, Barcelona, Spain

5 Faculty of Health Sciences, Continental University, Huancayo, Peru

6 Microbiology Department, Hospital Clinic of Barcelona, Spain

7Respiratory Intensive Care Unit, Hospital Clinic of Barcelona, Spain

***Equal contribution as first author**

**Correspondence:** Prof. Antoni Torres (primary) or Dr Catia Cillóniz (alternative)

August Pi i Sunyer Biomedical Research Institute–IDIBAPS

C/ Villarroel 170, 08036 Barcelona, Spain

Tel: (+34) 93-227-5779

Email: [atorres@recerca.clinic.cat](mailto:atorres@recerca.clinic.cat) (primary) or [cilloniz@recerca.clinic.cat](mailto:cilloniz@recerca.clinic.cat)(alternative)

**Data collection, evaluation, and microbiological diagnosis**

The aetiology was considered definite if one of the following criteria was met: (1) a positive blood culture (in the absence of an apparent extra-pulmonary focus); (2) a positive bacterial culture of pleural fluid or transthoracic needle aspiration samples; (3) elevated serum levels of IgM against Chlamydophila pneumoniae (≥1:64), Coxiella burnetii (≥1:80) and Mycoplasma pneumoniae (any positive titre); (4) seroconversion (i.e., a fourfold increase in IgG titres) for C. pneumoniae and L. pneumophila > 1:128, C. burnetii > 1:80 and respiratory viruses (influenza viruses A and B, parainfluenza viruses 1–3, respiratory syncytial virus, adenovirus); (5) positive urinary antigen for L. pneumophila (Binax Now L. pneumophila urinary Antigen Test; Trinity Biotech, Bray, Ireland); (6) positive urinary antigen for S. pneumoniae (Binax Now Streptococcus pneumoniae urinary Antigen Test; Emergo Europe, The Hague, The Netherlands); (7) bacterial growth in cultures of TBAS (≥105 cfu/ml), in protected specimen brush (≥103 cfu/ml), and BAL (≥104 cfu/ml); (8) detection of antigens by IFA plus virus isolation or detection by reverse transcriptase polymerase chain reaction (RT-PCR) testing for respiratory virus (influenza viruses A and B, parainfluenza virus 1–3, respiratory syncytial virus, rhinovirus, adenovirus).

The aetiology of pneumonia was classified as presumptive when a predominant microorganism was isolated from a purulent sample (leukocytes > 25 per high power microscopic field and few epithelial cells < 10 per high power microscopic field) and the findings of Gram staining were compatible. For the purpose of this study, presumptive and definitive diagnoses were analyzed together.

**Supplementary Table 1. Linear regression analyses showing the association of log-transformed eosinophil counts with lymphocyte, leukocyte, neutrophil, and C-reactive protein levels, including interaction with systemic corticosteroid use**

| **model** | **dependent.variable** | **term** | **estimate** | **std.error** | **statistic** | **p.value** |
| --- | --- | --- | --- | --- | --- | --- |
| 1 | Log10(Lymphocytes [×10⁹/L] + 0.01) | (Intercept) | 3.092228074 | 0.042458026 | 72.83023615 | <0.001 |
|  |  | log_eosinof1 | 0.218534696 | 0.032230242 | 6.78042374 | <0.001 |
|  |  | cortisistrSí | 0.225585952 | 0.139947414 | 1.611933694 | 0.108 |
|  |  | log_eosinof1:cortisistrSí | 0.185167987 | 0.117736554 | 1.572731508 | 0.116 |
| 2 | Log10(Leukocytes [×10⁹/L] + 0.01) | (Intercept) | 4.291530862 | 0.036102543 | 118.8705976 | <0.001 |
|  |  | log_eosinof1 | 0.247125393 | 0.027405741 | 9.017285422 | <0.001 |
|  |  | cortisistrSí | 0.103826544 | 0.118998879 | 0.872500184 | 0.383 |
|  |  | log_eosinof1:cortisistrSí | 0.027457321 | 0.100112732 | 0.274264032 | 0.784 |
| 3 | Log10(Neutrophils [×10⁹/L] + 0.01) | (Intercept) | 4.197862899 | 0.041763766 | 100.5144729 | <0.001 |
|  |  | log_eosinof1 | 0.25189149 | 0.031941487 | 7.886029034 | <0.001 |
|  |  | cortisistrSí | 0.076041869 | 0.137172948 | 0.55435033 | 0.580 |
|  |  | log_eosinof1:cortisistrSí | -0.010644498 | 0.115460389 | -0.09219177 | 0.927 |
| 4 | Log10(C-reactive protein [mg/L] + 0.01) | (Intercept) | 1.11635808 | 0.045557602 | 24.50432044 | <0.001 |
|  |  | log_eosinof1 | -0.065763148 | 0.034176726 | -1.924208536 | 0.055 |
|  |  | cortisistrSí | -0.143217614 | 0.154960323 | -0.924221184 | 0.356 |
|  |  | log_eosinof1:cortisistrSí | 0.085300757 | 0.126986379 | 0.671731544 | 0.502 |

Linear regression models were fitted with log-transformed eosinophil counts (log₁₀[eosinophils + 0.01]) as the main independent variable. Dependent variables were the log-transformed counts of lymphocytes, leukocytes, neutrophils, and C-reactive protein (CRP). An interaction term between eosinophil counts and systemic corticosteroid use was included to evaluate potential effect modification. Positive coefficients indicate a direct association between eosinophil counts and the corresponding hematological parameter. p-values <0.05 were considered statistically significant.

**Supplementary Table 2. Internal validation of the prediction model for 30-day mortality using nonparametric bootstrap technique**

| **Variable** | **Original** | **Bias** | **SE** | **P-value** | **95% BCa CI** |
| --- | --- | --- | --- | --- | --- |
| Age ≥65 years | 1.072 | 0.035 | 0.302 | 0.001 | 0.513 to 1.774 |
| Chronic liver disease | 1.163 | -0.006 | 0.341 | 0.001 | 0.441 to 1.823 |
| Fever | -0.486 | 0.014 | 0.252 | 0.044 | -1.006 to 0.038 |
| Eosinopenia (<0.05 x109/L) | 0.681 | 0.014 | 0.250 | 0.005 | 0.193 to 1.198 |

*Abbreviations.* BCa indicates adjusted bootstrap; CI, confidence interval; SE, standard error.

**Supplementary Figure 1**


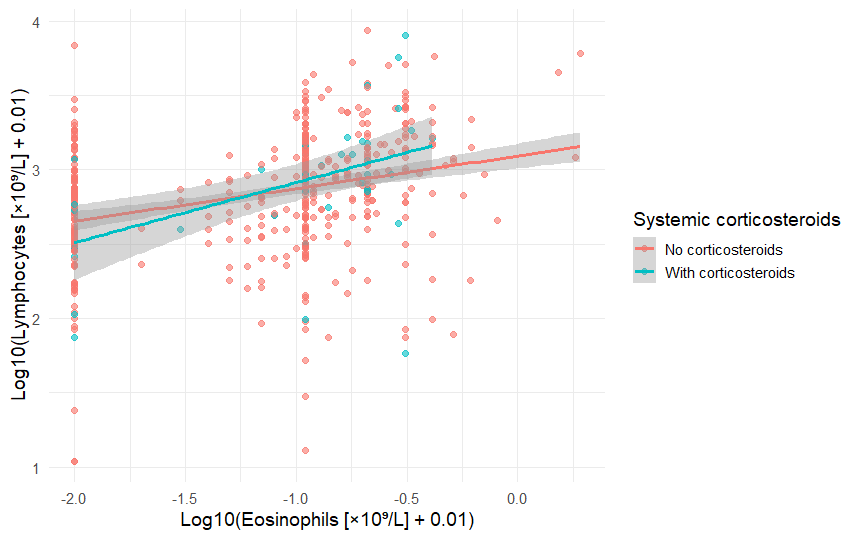


**Supplementary Figure 2**


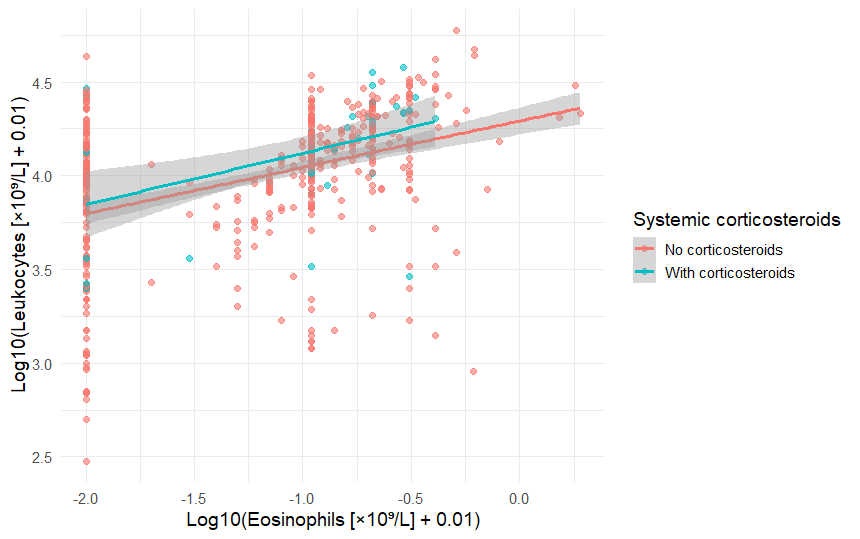


**Supplementary Figure 3**


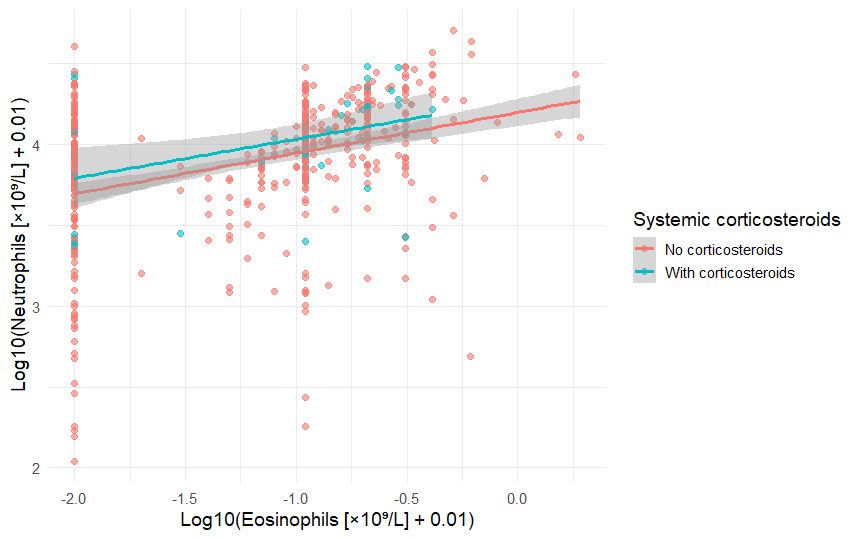


**Supplementary Figure 4**


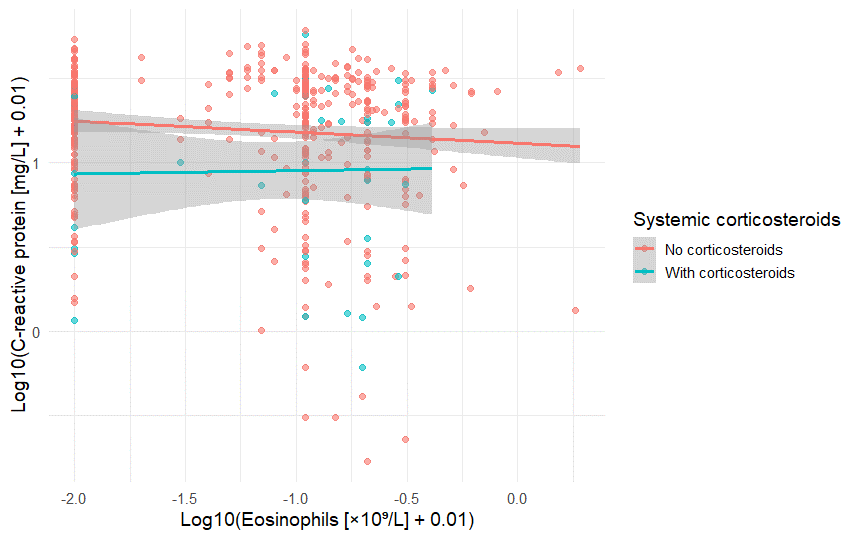

Supplement: Supplementary file 1 [file 3a306e56534b15a0e04b671a.docx]
